# Supplementary material for: Soil-vegetation-water interactions controlling solute flow and transport in volcanic ash soils of the high Andes
Source: Copernicus journal article supplement (doi:10.5194/hess-2022-294), 2022-09-09
Supplement: Supplementary file [file hess-2022-294-AC2-supplement.pdf]

## Author comments (ACs)

The authors thank the reviewers for their constructive comments. The comments are shown in black font, and our responses are in regular blue font.

### RC2: 'Comment on hess-2022-294', Anonymous Referee #2, 15 Nov 2022

This manuscript evaluates soil water and solute fluxes in two soil profiles under two different vegetation, i.e., the cushion-forming plants (CU-UR) and tussock grasses (TU-UP). This evaluation was based on measurements of soil water content, water flux density, and solute concentrations and the outputs from the well-known HYDRUS-1D model. These measurements and modeling allowed for evaluating the role of soil water balance on soil chemical weathering, which was one of the paper's main objectives.

Overall, the paper is well-written and suits the scope of HESS. Nevertheless, essential points must be included or further analyzed, especially in the methodology and discussion sections. These major points are described below, and a few minor considerations are described afterward.

We respond in detail below.

In the introduction, the statement "we hypothesize that vegetation type has an impact on water and solute fluxes (...)" does not suit well as a hypothesis since it has been well demonstrated, especially in the context of root water uptake modeling. Therefore, the hypothesis should be stated just as a particular case for these two vegetation types, not as an overall case.

We will adjust the hypothesis for our particular case

There needs to be more information about how  $ET_a$  and  $ET_p$  were determined. Only lines 229-230 say that " $ET_a$  was derived from potential evapotranspiration ( $ET_p$ ) according to the surface pressure head and soil moisture" and in the supplementary material 3 it is stated that "...  $ET_p$  [was] based on the Penman-Monteith equation". Notice that  $ET_p$  from the Penman-Monteith method requires values of parameters such as crop canopy resistance and albedo. What were the values for each vegetation type? Furthermore,  $ET_p$  is usually partitioned into potential transpiration and soil evaporation in hydrological modeling. Therefore, the authors should also shortly describe this and present the values of the parameters for each vegetation.

We will include more details on the determination of the  $ET_p$  and how we used the Penman-Monteith equation in this area. There are very few data on the plant transpiration and soil evaporation in these environments, and even less on the potential impact of vegetation roughness and albedo on evapotranspiration. The focus of this study is the water flux modelling, not that much the evapotranspiration modeling.

The methodology lacks information about root measurements, yet Figure 3 shows the vertical distribution of root diameter and abundance. Only the maximum rooting depth for each vegetation is given (lines 133--134). The authors also need to show how they determined the relative distribution of root length density over depth. How was it considered in the HYDRUS model? What about the transpiration reduction function? As far as I know, Hydrus-1D has two options for transpiration reduction functions: the Feddes and Jarvis model. I would like to know about values used for the empirical threshold parameters and if they can impact the simulation results.

We considered that the effect of the root system is included in the measured soil properties. As indicated above, we did not consider the partitioning of evapotranspiration into evaporation and transpiration. It was not the goal of this manuscript. We will provide more details on the root measurements in the revised manuscript.

At the beginning of section 5.1, the authors compare ET<sub>a</sub> from CU-UR and TU-UP and cite values from other studies (in the second paragraph) but do not explain why ET<sub>a</sub> from CU-UR is higher than ET<sub>a</sub> from TU-UP. This difference is enhanced in dry periods but is also not explained. This discussion is brought back only in the fourth paragraph. First, in my opinion, this discussion should be placed right after the first paragraph. Second, the authors show some evidence for the higher (lower) ET<sub>a</sub> from CU-UR (TU-UP) but need to address why this happens. For instance, the authors should explain why in 2A horizon under tussocks, which has about 50% of the roots (roughly looking at Figure 3f), the highest soil moisture is observed, but annual ET<sub>a</sub> is well below ET<sub>p</sub>. Overall, the discussions are mainly based on soil water content, but when it comes to actual transpiration, one should look at the soil pressure head. Thus, the differences in soil hydraulic functions between soil layers and the two soil profiles need to be considered in the discussions. Papers related to root water uptake modeling might be useful to enhance these discussions.

We can reorganize the text to improve the flow of the text. We will place the fourth paragraph at the beginning of section 5.1. We will further look into the differences in the soil hydraulic functions between soil horizons and profiles, and analyze how they are related to differences in ET<sub>a</sub> and ET<sub>p</sub>. We will include in the discussion of section 5.1 the differences in fitted water retention curves.

The discussion about soil water flux needs further analysis (section 5.1, 494--506). The authors attribute the differences in vertical water fluxes and deep drainage to the vertical distribution of soil water storage. However, notice that soil water content distribution is also affected by water flux. Also, stating that "soil water storage capacity is limited by lower  $\theta_T$  AW and KSAT" is misleading since a high hydraulic conductivity promotes the reduction of soil water content in the soil layer. I think this discussion should be based on the soil hydraulic functions from each soil profile, considering the hydraulic conductivity and soil retention curve rather than on soil water content or soil water storage.

Many thanks for this suggestion, we will include in the revised discussion of section 5.1 the differences in fitted water retention curves.

Minor comments:

1) l187. There is no Figure 2e.

We will change 2e with 2d.

2) l218. The Kling-Gupta efficiency (KGE) may not be well known as the other measures for goodness-of-fit and may need some description and citation.

We will include additional information on KGE

3) l228. What do you mean by surface pressure head?

We will explain this sentence in more detail

4) l334--336. These relations are not clear to me. Can we see them in any table?

The parameters are in the Supplementary material but we can include these tables in the main text

5) l410. Measured or simulated values in Table 3?

We will clarify this in the Table 3 description

7) Fig 7. The line colors for each soil horizon are hard to recognize in the figure.

We will modify the colors of the lower horizons.

6) l494. ``There is approximately 3-fold less water flux transmitted from the A to the underlying horizons under cushion plants (Table 3, Fig. 7b)'. It does not match to what is shown in Table 3.

We will rephrase the sentence

7) The Equation 1 from the supplementary material 3 must have the sink term for root water uptake.

We did not include the sink term for root water uptake since we are not considering the partitioning of the evapotranspiration into evaporation and transpiration.
